# Supplementary material
Source: PubMed Central journal article supplement (PMC509199)

A

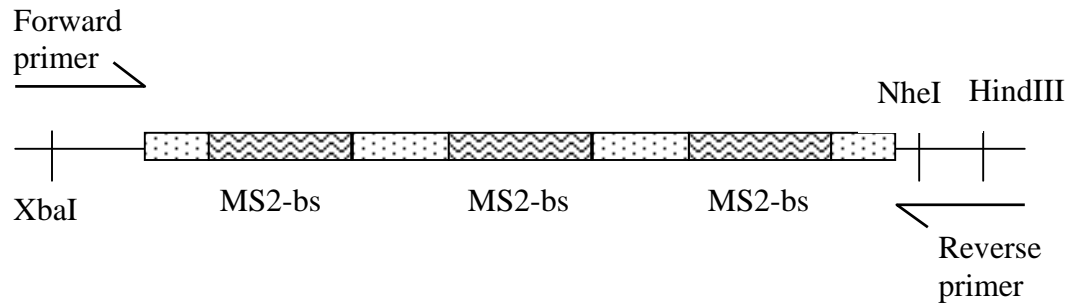

B

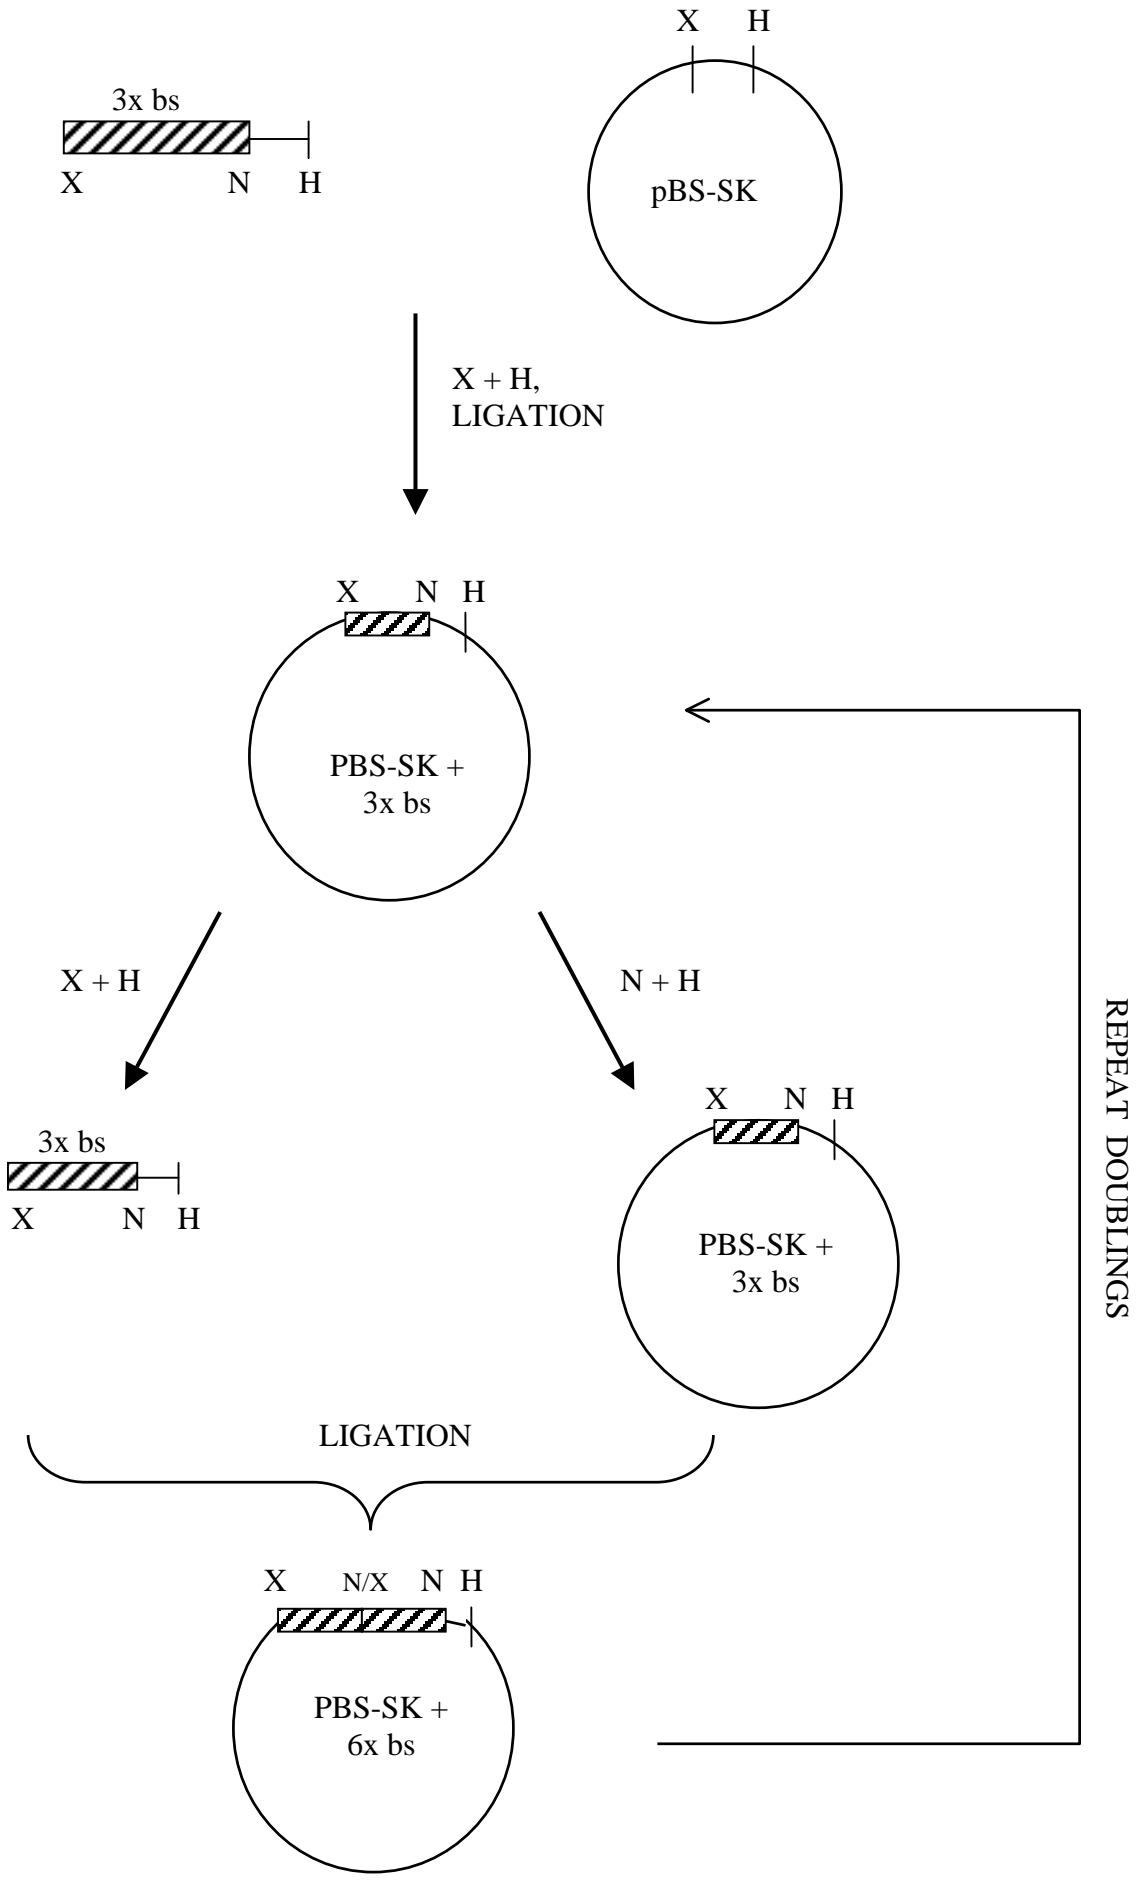

Supplement: pnas_101_31_11310__2.pdf [file pnas_101_31_11310__2.pdf]

A

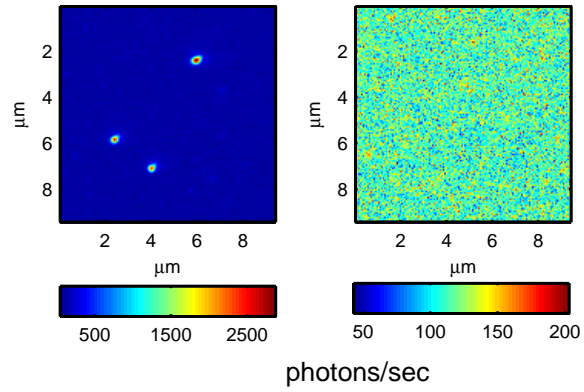

B

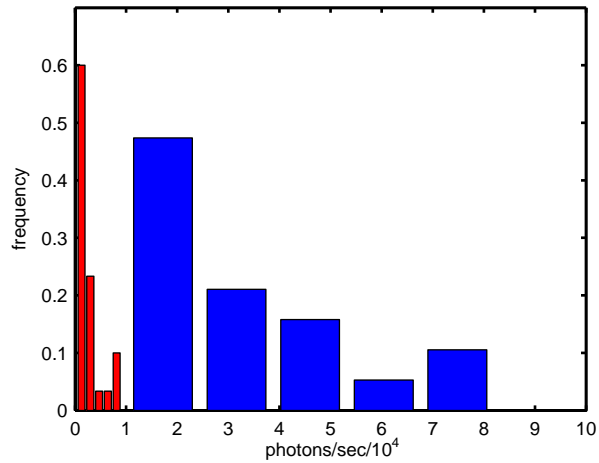

Supplement: pnas_101_31_11310__3.pdf [file pnas_101_31_11310__3.pdf]
